# Supplementary material for: A descriptive analysis of non-Cochrane child-relevant systematic reviews published in 2014
Source: Springer Nature journal article supplement (doi:10.1186/s12874-018-0562-2), 2018-10-01
Supplement: MOESM1 [file 16165244]

## Supplementary file 1. literature search strategy

**Database:** Ovid MEDLINE(R) In-Process & Other Non-Indexed Citations and Ovid MEDLINE(R)

1946 to Present

1. exp Adolescent/
2. exp Child/
3. exp Infant/
4. exp Minors/
5. exp Pediatrics/
6. exp Puberty/
7. exp Schools/
8. (baby\* or babies or infant\* or infancy or neonat\* or newborn\* or postmatur\* or prematur\* or preterm\*).mp.
9. (boy\* or girl\* or teen\*).mp.
10. (child\* or kid or kids or preschool\* or school age\* or schoolchild\* or toddler\*).mp.
11. (elementary school\* or high school\* or highschool\* or kindergar\* or nursery school\* or primary school\* or secondary school\*).mp.
12. minors\*.mp.
13. (paediatric\* or peadiatric\* or pediatric\*).mp.
14. (prepubescen\* or pubescen\* or pubert\*).mp.
15. or/1-14 [Combined MeSH & Keywords for children] (3712156)
16. medline.tw
17. systematic review.tw
18. meta analysis.pt
19. or/16-18 [HIRU SR filter for max specificity] (141272)
20. and/15,19 [Combined child terms and SR filter] (25710)
21. Cochrane database of systematic reviews.jn [Journal name] (11759)
22. 20 not 21 [removing Cochrane SRs from the search results] (22577)
23. exp animals/ not humans.sh.
24. 22 not 23 [removing animal studies from the search results] (22526)
25. limit 24 to yr="2014" [publication date limit] (2901)
26. limit 25 to english (2824)
27. remove duplicates from 26 (2546)

**Database:** CINAHL via EBSCOhost

- S1 (MH "Adolescence+")
- S2 (MH "Child+")
- S3 (MH "Infant+")
- S4 (MH "Minors (Legal)")
- S5 (MH "Pediatrics+")
- S6 (MH "Puberty+")
- S7 adoles\*

S8 baby\* or babies or infant\* or infancy or neonat\* or newborn\* or postmatur\* or prematur\* or preterm\*

S9 boy\* or girl\* or teen\*

S10 child\* or kid or kids or preschool\* or "school age\*" or schoolchild\* or toddler\*

S11 "elementary school\*" or "high school\*" or highschool\* or kindergar\* or "nursery school\*" or "primary school\*" or "secondary school\*"

S12 minors\*

S13 paediatric\* or peadiatric\* or pediatric\*

S14 prepubescen\* or pubescen\* or pubert\*

S15 S1 OR S2 OR S3 OR S4 OR S5 OR S6 OR S7 OR S8 OR S9 OR S10 OR S11 OR S12 OR S13 OR S14 [Combined CINAHL Headings and keywords for children] (796,970)

S16 TX meta analysis

S17 PT systematic review

S18 S16 OR S17 [SR filter] (112,570)

S19 S15 AND S18 [Child results limited to SRs] (23,259)

S20 SO cochrane database of systematic reviews

S21 S19 NOT S20 [Removal of Cochrane SRs] (21,334)

S22 (MH "Animals+") not (MH "Humans")

S23 S21 NOT S22 [removal of animal studies] (21,256)

S24 S21 NOT S22 Published Date: 20140101-20141231 [publication date limit] (2431)

S25 S21 NOT S22 English Language ; Published Date: 20140101-20141231 [language limit] (2378)

### Database 3: Web of Science Core Collection

NOTE: All searches limited to 2014

1. TS=(baby or babies or infant\* or neonat\* or toddler\* or child\* or adolescen\* or teen\* or youth or p?ediatric\*) [topic search for children] (83114)
2. TS=((meta analys\*) OR meta-analys\* OR metaanalys\* OR (systematic review\*)) (29629)
3. #2 AND #1 [Child SRs] (3605)
4. SO=(Cochrane Database of Systematic Reviews) (826)
5. #3 NOT #4 [remove Cochrane SRs] (1499)
6. TS=(animal\* or bovine or cat\* or dog\* or mice or mouse or pig\* or porcine or rat or zebrafish) NOT TS=(human\*)
7. #5 NOT #6 [animal filter] (3209)
8. #5 NOT #6 Refined by: DOCUMENT TYPES: ( REVIEW ) (1135)
9. #5 NOT #6 Refined by: DOCUMENT TYPES: ( REVIEW ) AND LANGUAGES: ( ENGLISH ) (1116)

### Database 4: PubMed

((((Infant[MeSH] OR Infant\* OR infancy OR Newborn\* OR Baby\* OR Babies OR Neonat\* OR Preterm\* OR Prematur\* OR Postmatur\* OR Child[MeSH] OR Child\* OR Schoolchild\* OR School age\* OR Preschool\* OR Kid OR kids OR Toddler\* OR Adolescent[MeSH] OR Adoles\* OR Teen\* OR Boy OR Boys OR Girl\* OR Minors[MeSH] OR Minors\* OR Puberty[MeSH] OR

Pubert\* OR Pubescen\* OR Prepubescen\* OR Pediatrics[MeSH] OR Pediatric\* OR Paediatric\* OR Peadiatric\* OR Schools[MeSH] OR Nursery school\* OR Kindergar\* OR Primary school\* OR Secondary school\* OR Elementary school\* OR High school\* OR Highschool\*) AND (MEDLINE[Title/Abstract] OR (systematic[Title/Abstract] AND review[Title/Abstract]) OR meta analysis[Publication Type])) NOT (((Animals[MESH] OR Animal Experimentation[MESH] OR "Models, Animal"[MESH] OR Vertebrates[MESH]) NOT (Humans[MESH] OR Human experimentation[MESH])) OR (((animals[tiab] OR animal model[tiab] OR rat[tiab] OR rats[tiab] OR mouse[tiab] OR mice[tiab] OR rabbit[tiab] OR rabbits[tiab] OR pig[tiab] OR pigs[tiab] OR porcine[tiab] OR swine[tiab] OR dog[tiab] OR dogs[tiab] OR hamster[tiab] OR hamsters[tiab] OR chicken[tiab] OR chickens[tiab] OR sheep[tiab])) AND (publisher[sb] OR inprocess[sb] OR pubmednotmedline[sb])) NOT (human[ti] OR humans[ti] OR people[ti] OR children[ti] OR adults[ti] OR seniors[ti] OR patient[ti] OR patients[ti]))) NOT ("the cochrane database of systematic reviews"[Journal])) AND ("2014/01/01"[PDat] : "2014/12/31"[PDat])  
Filters: English
